# Supplementary material
Source: PubMed Central journal article supplement (PMC387319)
Supplement: pnas_101_14_4746__2.pdf [file pnas_101_14_4746__2.pdf]

**Table 2. Fifty-two variable sites within the 388-bp HVS1 sequence for 39 Ladakhis (Top: Buddhists, *n* = 26; Bottom: Muslims, *n* = 13)**

|      | 11         | 1111111111 | 1122222222 | 2222222223  | 3333333333 | 33 |
|------|------------|------------|------------|-------------|------------|----|
|      | 3456689901 | 2234478888 | 9912233456 | 6677789990  | 0111445556 | 88 |
|      | 7811962341 | 6965822369 | 2373424960 | 1604890292  | 4169682562 | 78 |
| CRS  | AGATCTTTCC | TGTGCTAACT | CCTCTCCTCC | CCCGCACCAA  | TTAGGCTCTT | AG |
| L37  | .....      | .....      | .....      | .....       | .....      | .. |
| L13  | .....      | .....      | ...T.....  | .....T..    | .....      | —  |
| L8   | .....      | .....      | ...T.....  | .....G....  | .....      | .. |
| L106 | .....C...  | .....      | ...T.....  | .....G....  | .....      | .. |
| L98  | .....      | .....      | ...T.....  | .....       | .....C     | .. |
| L72  | .....C.... | .....      | ...T.....  | .....       | .....C     | .. |
| L90  | .....      | ...A.....  | ...T.....  | .....       | .....C     | .. |
| L139 | .....      | .....C     | .....      | .....       | C.....     | —  |
| L25  | —...A..... | .....C     | .....      | .....       | C.....     | GA |
| L83  | .....      | .....      | ...T..T... | .....       | ..G.....C  | .. |
| L134 | .....      | .....      | ...T..T... | .....       | ..G.....C  | —  |
| L135 | .....      | .....      | ...T...T.  | .....       | ..C.....C  | —  |
| L74  | .....      | .....      | ...T.....  | .....T...   | ...A.....C | .. |
| L23  | .....      | .....      | ...T.....  | .....T...   | ...A.....C | .. |
| L15  | G.....     | .....      | .....      | .....T..... | .....TC..  | .. |
| L119 | .A.....    | .A.....    | ...T.....  | .....G      | .....      | .. |
| L22  | .A.....    | .A.....    | ...T.....  | .....       | ..C.....—  | —  |
| L12  | .....      | .....C.C   | .....      | .....       | C.....     | .. |
| L125 | .....      | .....C.C   | .....A.C.  | .....       | C.....     | .. |
| L133 | .....      | .....C.C   | .....A.C.  | .....       | CC.....C   | .. |
| L107 | .....      | .....CC.C  | ...T.....  | ...A.....   | .....C     | .. |
| L120 | .....      | .....CC.C  | ...T.....  | ...A.....   | .....C     | .. |
| L128 | .....T     | .A.....    | .....      | .T.....     | C.....     | .. |
| L11  | ...T.....  | C..A.C...  | .....      | T.....      | ...A.....  | .. |
| L79  | —.....     | ...A.....C | ...T.....  | .....       | .....T..   | .. |
| L6   | .....CT.   | .....      | ...T.....  | ...A.....   | .....C     | .. |
| L44  | .....      | ..C.....   | .....      | .....       | .....C.    | .. |
| L67  | .....      | .....      | ...T.....  | .....       | .....C     | .. |
| L71  | .....      | .....      | .....T.    | ..T.....    | .....      | .. |
| L113 | .....      | .....      | T..T.....  | .....       | C.....     | .. |
| L27  | ...T.....  | C.....     | ...T.....  | ...T.....   | .....      | .. |
| L52  | .....      | ...T.....  | ...T...T   | .....       | ..C.....   | —  |
| L126 | .....      | .....      | ...T..T... | .....       | ..G.....C  | —  |
| L36  | .....      | .....      | ...T..T... | .....       | ..G.....C  | .. |
| L60  | .....      | .....      | ...TC.T... | .....       | ..G.....C  | .. |
| L144 | .....C...  | .....CC.C  | ..C.....   | T.....G.    | .....      | .. |
| L158 | .....C...  | .....CC.C  | ..C.....   | T.....G.    | .....      | .. |
| L57  | ..G.....   | .C...CC.C  | .....T     | .....       | .....CC    | .. |
| L39  | .....      | .....CCTC  | ..C.....   | .....G.     | ..C.....   | .. |

Vertical numbers at the top of the table indicate the positions of variable sites beginning at 16,000 in the Cambridge Reference Sequence. ., identity to CRS; —, missing data.
