# Supplementary material
Source: PubMed Central journal article supplement (PMC387319)

# Ancestral East Asia

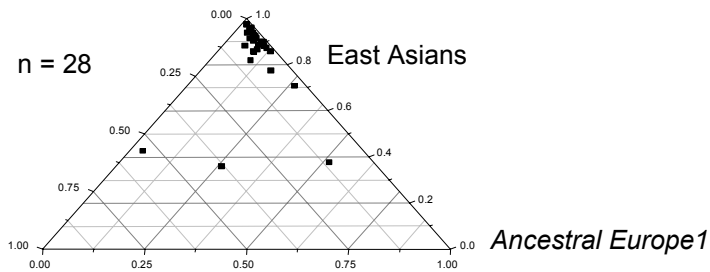

*Ancestral Europe 2*

*Ancestral Europe 1*

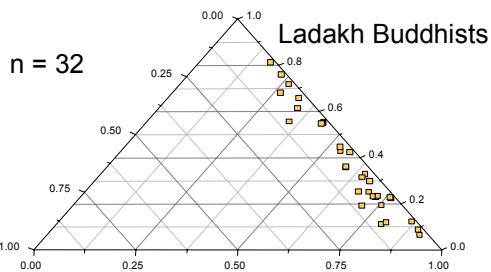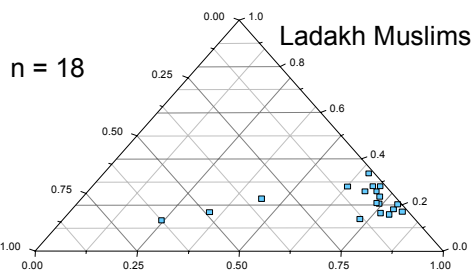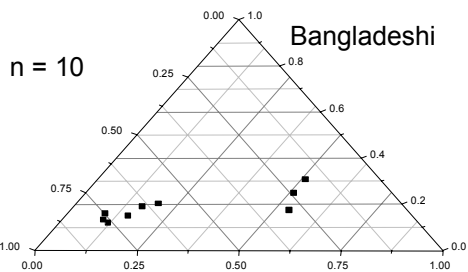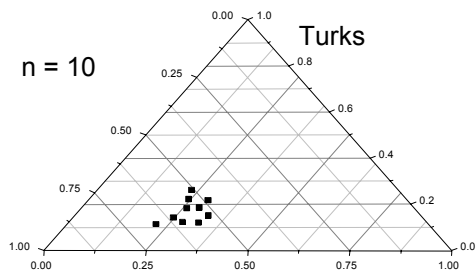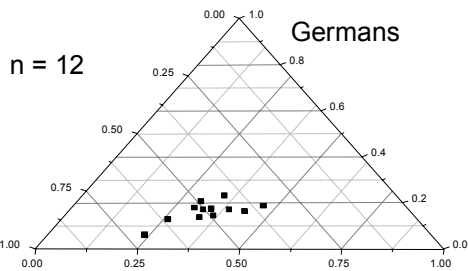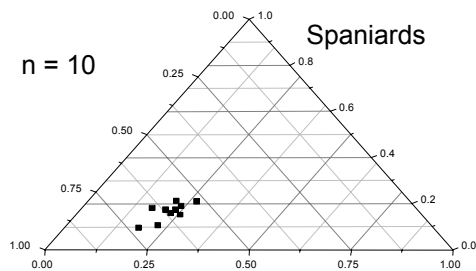

Supplement: pnas_101_14_4746__6.pdf [file pnas_101_14_4746__6.pdf]
